# Supplementary material
Source: publisher figshare collection journal article supplement (https://acs.figshare.com/ndownloader/files/5774637)
Supplement: Supplementary file 1 [file 5774637]

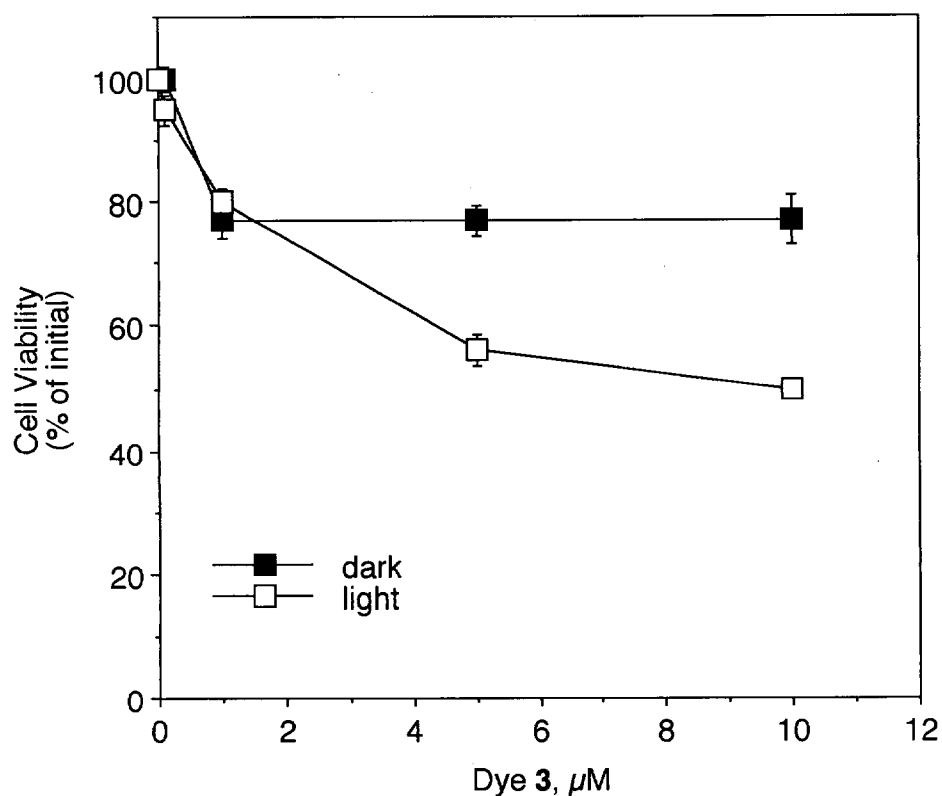

**Figure 4.** Effect of dye photosensitization on the cell viability of cultured R3230AC tumor cells. Details of experimental conditions are described in the Experimental Section. Data are expressed as percent viable cells, compared to untreated cells, for cells treated with selenopyrylium dye **3** in the dark (■) or for cells treated with dye and 7.5 J cm<sup>-2</sup> irradiation (□). Each datum point represents the mean percent viable cells calculated from at least 3 separate experiments performed in duplicate, bars are the SEM.

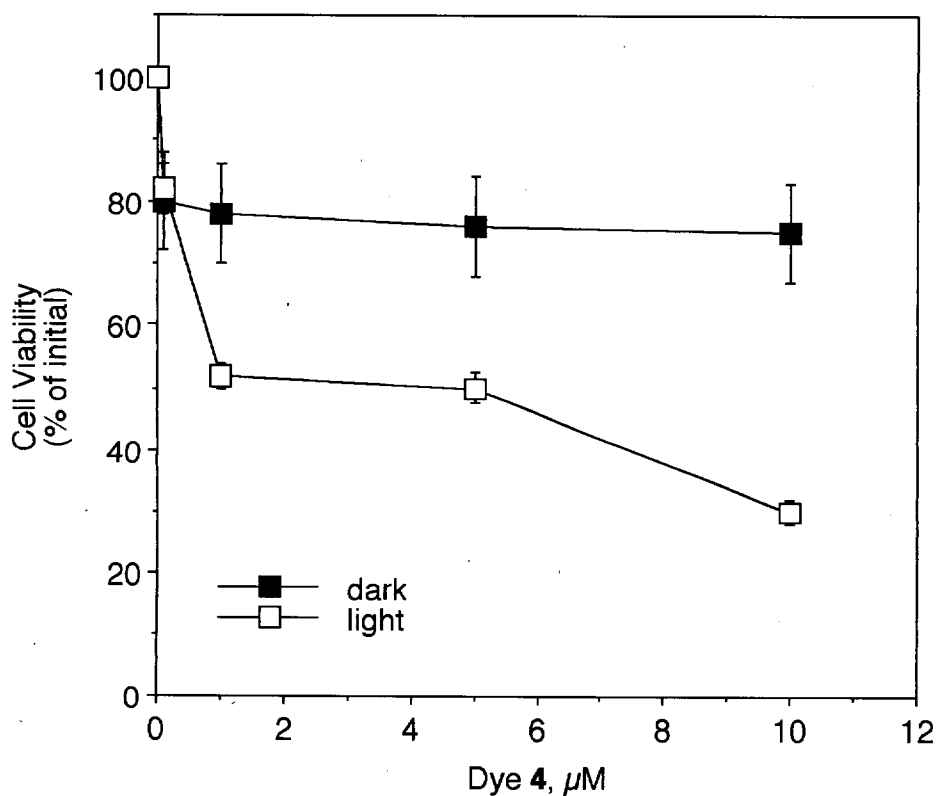

**Figure 5.** Effect of dye photosensitization on the cell viability of cultured R3230AC tumor cells. Details of experimental conditions are described in the Experimental Section. Data are expressed as percent viable cells, compared to untreated cells, for cells treated with telluropyrilium dye **4** in the dark (■) or for cells treated with dye and 7.5 J cm<sup>-2</sup> irradiation (□). Each datum point represents the mean percent viable cells calculated from at least 3 separate experiments performed in duplicate, bars are the SEM.
